# Supplementary material for: β-Xylosidase SRBX1 Activity from Sporisorium reilianum and Its Synergism with Xylanase SRXL1 in Xylose Release from Corn Hemicellulose
Source: MDPI journal article supplement (doi:10.3390/jof8121295), 2022-12-13
Supplement: s1 [file s1]

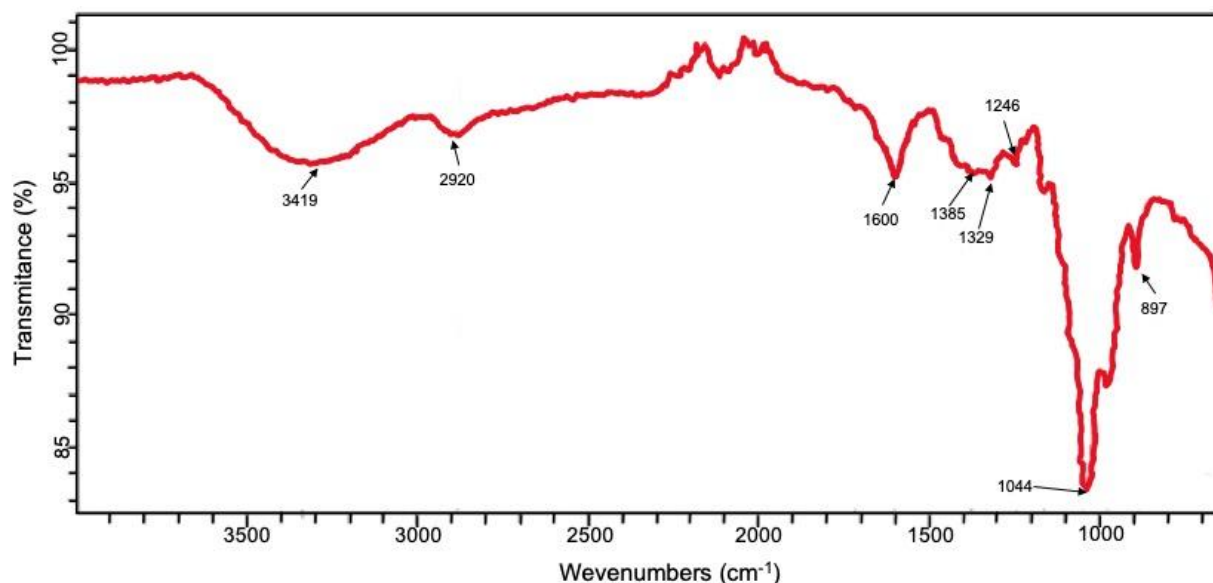

**Supplementary Figure S1.** FT-IR spectra of the hemicellulose obtained from corn cobs. The arrows indicate the characteristic wavenumbers of this polymer.

↓

```

1  MKAAVKSLLVLSIYAANVLSAQAAASLEHLNMLFHTRQADASNSTDSSSVN 50
51  WNISSDNSALATAPLAGTFYRGGPALADANSPFHPVTGNGGWEWAVVKA 100
101 RSVVGQLTLEEKVNLTAGITGGRCEGTLGRVDRFGIPELCFQDGPAGFRA 150
151 SDFVTVFPAGVTTAATWNRDLIYKRAAALGAEFVAKGVNVHLGPVTGGPL 200
201 GRSPFQGRNWEFGFDPYLGHEAAYYTVSGTQSAGVISTAKHFLAYEQET 250
251 YRQLYAASDPFTLNPNNTTELTYSANLDDRTLHELYLWPFMNAVRAGTGA 300
301 LVCVYNRVNSTQGCESSKLLNEILKDELDYQGFVTDWSAAFNTSNTYNG 350
351 GSDVVMPPGGMTGGYKNLVGGSDLVRALNAGEVKIERINDGITRLLTQWYL 400
401 RGQDKGYPTVSYKDGYQNTIFNGTVVNEHRDVQGDHRKIVKEIGEEAVTL 450
451 IYNKRSNKAGPQNTDFGLGLPLAKKARVAVFGSDAGPNPYGANACQDWI 500
501 GLGSQLCPANATSNGTQAVGWGSGAGFFPYLIDPLAGISEVAKENRGAVL 550
551 HNLNDVGDDKNQMYVKQQAGLADASLVFVQARSGEDSDRHSLRLDADGDE 600
601 LIKLVASQSNNTIVVMHTVGPVLMGDWFDHPNITALLVLPHLPGQESGSSL 650
651 ARVLYGDVNPSGKMPYSMLSDEDAKRYPKIVGSPASDPQVDFYDGLYIDY 700
701 RAWDKMGLKPLIPFGHGISYTNYSYSNLHIQKAGDNCYAPSAFSGSFKSD 750
751 KQPGGPGSLFQYLVEVSADVQNVGAMAGDEVAQLYVGYPEAANAPIKQLR 800
801 GFDKVQGLEPGAASKQATFKLAKRDFSVWDVVKQKFEVVDGEYKIWVGKS 850
851 SRMSDLTLKGSVTMQNGMVVGMS 874

```

**Supplementary Figure S2.** Predicted theoretical amino acid sequence of  $\beta$ -xylosidase SRBX1 from *S. reilianum*. The signal peptide is underlined, and an arrow indicates the cleavage site. The motive of the glycosyl hydrolases family 3 is indicated in bold letters. The glycosylation sites are highlighted in black. The sequences of the peptides obtained from the sequencing are highlighted in gray.
